# Supplementary material
Source: publisher figshare collection journal article supplement (https://sage.figshare.com/ndownloader/files/12388541)

**The Politics of Chequebook Federalism:  
Can Electoral Considerations Affect Federal-Provincial Transfers?**

**ONLINE APPENDIX**

Marcelin Joanis<sup>1</sup>  
Polytechnique Montréal and CIRANO

---

<sup>1</sup> Contact email: [marcelin.joanis@polymtl.ca](mailto:marcelin.joanis@polymtl.ca).

### Timeline of significant changes to the main transfer programs, 1982-2012

| FY   | Equalization                                                                                                                                                                                                                                    | Social transfers                                                                                                                                                                       |
|------|-------------------------------------------------------------------------------------------------------------------------------------------------------------------------------------------------------------------------------------------------|----------------------------------------------------------------------------------------------------------------------------------------------------------------------------------------|
| 1982 | <ul style="list-style-type: none"> <li>Various changes to the RTS</li> <li>10-prov. standard abandoned in favour of 5-prov. standard</li> <li>Floor and minimum increase provisions [NS, NF]</li> <li>Transitional payments [QC, MB]</li> </ul> | <ul style="list-style-type: none"> <li>Total EPF equal per capita (previously only cash portion)</li> <li>Limits to the growth of EPF total cost</li> </ul>                            |
| 1984 |                                                                                                                                                                                                                                                 | Canada Health Act: some provinces penalized (withheld EPF payments) for allowing extra-billing or user charges                                                                         |
| 1985 | <ul style="list-style-type: none"> <li>Supplementary equalization is introduced to relay the Transitional payments [NS, QC, MB, PE, NB, NF]</li> <li>Atlantic accord [NF]</li> </ul>                                                            |                                                                                                                                                                                        |
| 1986 | Atlantic accord [NS]                                                                                                                                                                                                                            | Further limits to EPF growth                                                                                                                                                           |
| 1987 | <ul style="list-style-type: none"> <li>Supplementary equalization abolished</li> <li>Small changes to the RTS</li> <li>Forgiveness of amounts due by recipient provinces (linked to data revisions)</li> </ul>                                  |                                                                                                                                                                                        |
| 1988 |                                                                                                                                                                                                                                                 | CAP: supplementary contributions                                                                                                                                                       |
| 1990 |                                                                                                                                                                                                                                                 | 'Cap on CAP' [ON, AB, BC]                                                                                                                                                              |
| 1991 |                                                                                                                                                                                                                                                 | 'Cap on CAP' extended                                                                                                                                                                  |
| 1992 | Changes to ceiling provisions                                                                                                                                                                                                                   | EPF: changes to associated equalization                                                                                                                                                |
| 1993 | 1991 census population estimates: compensation for EPF underpayment (but overpayment of equalization)                                                                                                                                           |                                                                                                                                                                                        |
| 1996 |                                                                                                                                                                                                                                                 | CHST replaces EPF and CAP                                                                                                                                                              |
| 1999 | Ceiling removed for the current fiscal year                                                                                                                                                                                                     | <ul style="list-style-type: none"> <li>CHST: increases for health care component</li> <li>Complete elimination of per capita disparities due to CAP's integration into CHST</li> </ul> |
| 2000 |                                                                                                                                                                                                                                                 | CHST supplement                                                                                                                                                                        |
| 2002 | Permanent removal of the ceiling                                                                                                                                                                                                                |                                                                                                                                                                                        |
| 2003 | Changes to the measurement of the residential capital stock : any negative effect on entitlements is suspended for one year                                                                                                                     | <ul style="list-style-type: none"> <li>CHST broken down in CHT and CST</li> <li>Health reform transfer (HRT)</li> <li>Diagnostic and medical</li> </ul>                                |

|      |                                                                                                                                                                                                                                                                                                                                                                                                                                                                |                                                                                                                                                                                                                                                                                                                            |
|------|----------------------------------------------------------------------------------------------------------------------------------------------------------------------------------------------------------------------------------------------------------------------------------------------------------------------------------------------------------------------------------------------------------------------------------------------------------------|----------------------------------------------------------------------------------------------------------------------------------------------------------------------------------------------------------------------------------------------------------------------------------------------------------------------------|
|      |                                                                                                                                                                                                                                                                                                                                                                                                                                                                | equipment fund                                                                                                                                                                                                                                                                                                             |
| 2004 | <ul style="list-style-type: none"> <li>• Fixed payment funding levels</li> <li>• Moving average (3 years) phased in gradually</li> <li>• Updates to a number of tax bases, including property taxes [BC] and hospital and medical insurance premiums [AB, BC]</li> </ul>                                                                                                                                                                                       | <ul style="list-style-type: none"> <li>•</li> </ul>                                                                                                                                                                                                                                                                        |
| 2005 | Offset payments as a continuation of offshore accord [NF]                                                                                                                                                                                                                                                                                                                                                                                                      | Wait times reduction transfer                                                                                                                                                                                                                                                                                              |
| 2006 | Use of a more recent set of estimates to base equalization payments                                                                                                                                                                                                                                                                                                                                                                                            |                                                                                                                                                                                                                                                                                                                            |
| 2007 | <ul style="list-style-type: none"> <li>• 10-prov. standard</li> <li>• 50% exclusion of resource revenues</li> <li>• Provincial cap : no receiving prov. can have fiscal capacity higher than a non-recipient prov.</li> <li>• Simplified RTS : 33 to 5 tax bases</li> <li>• Atlantic accord provinces can continue to operate under the previous system for the duration of the accords [NF, NS]; other provinces may not lose under the new system</li> </ul> | Equal per capita CST effective FY07 (same for CHT effective FY14)                                                                                                                                                                                                                                                          |
| 2009 | Growth of the program tied to 3-year moving average of nominal GDP growth                                                                                                                                                                                                                                                                                                                                                                                      | <ul style="list-style-type: none"> <li>• All equalization recipients to receive same per capita CHT cash [ON].</li> <li>• Subject to transition protections, no province with a high fiscal capacity can receive more than the average receiving prov. (protects high capacity provinces from declines in CHT).</li> </ul> |

Source: Author's compilation of Treff and Perry (various years).

Note: [xx, yy] province(s) targeted by the measure, where applicable.

**Figure 1. Evolution of equalization payments per capita since 2002 (in current dollars)**

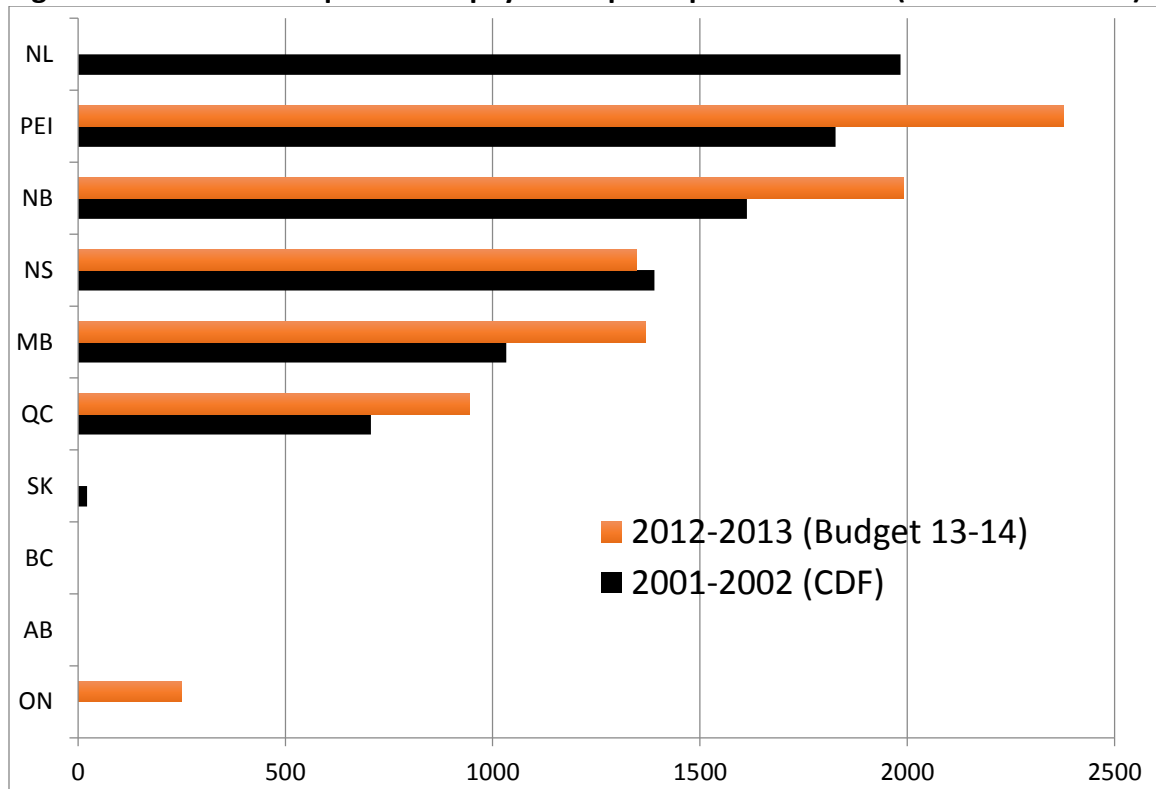

Source: Commission on Fiscal Imbalance (2002) and Québec's 2013-14 Budget.

Figure 2. Newfoundland and Labrador

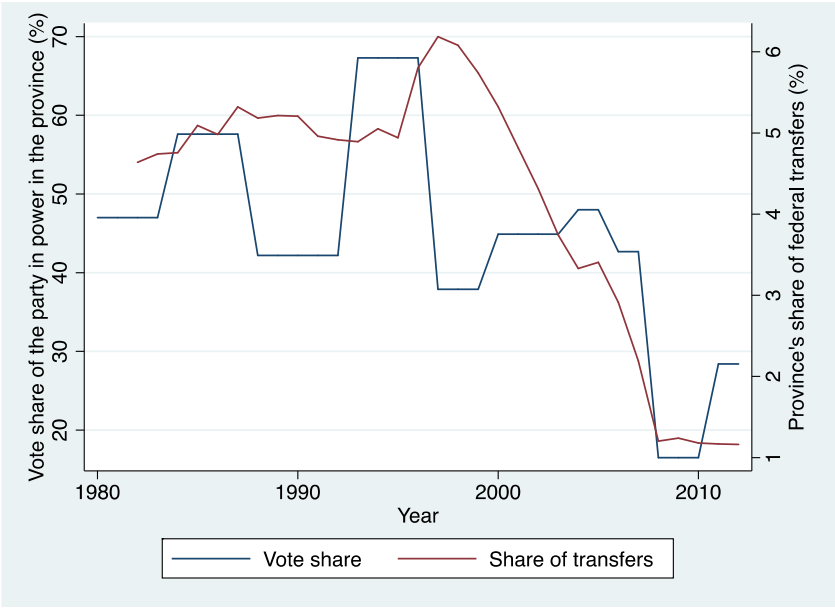

Figure 3. Prince Edward Island

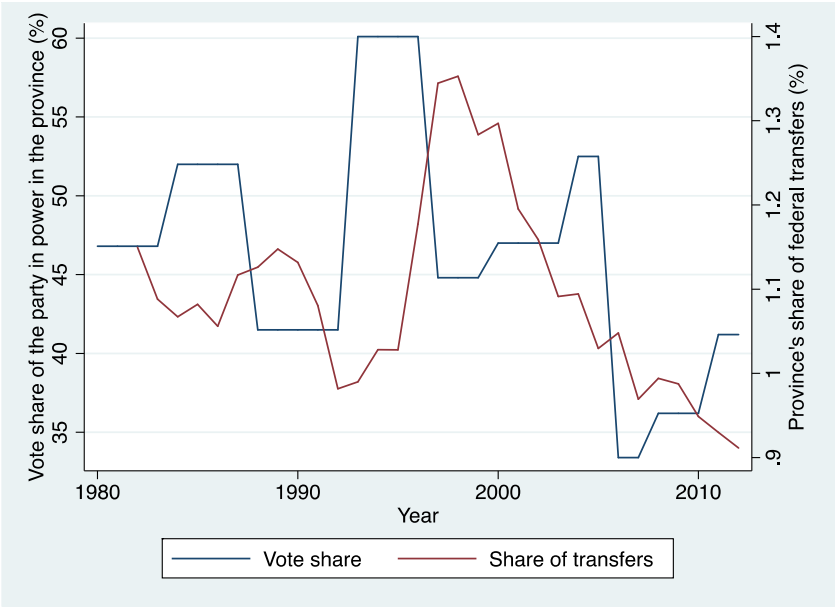

Figure 4. Nova Scotia

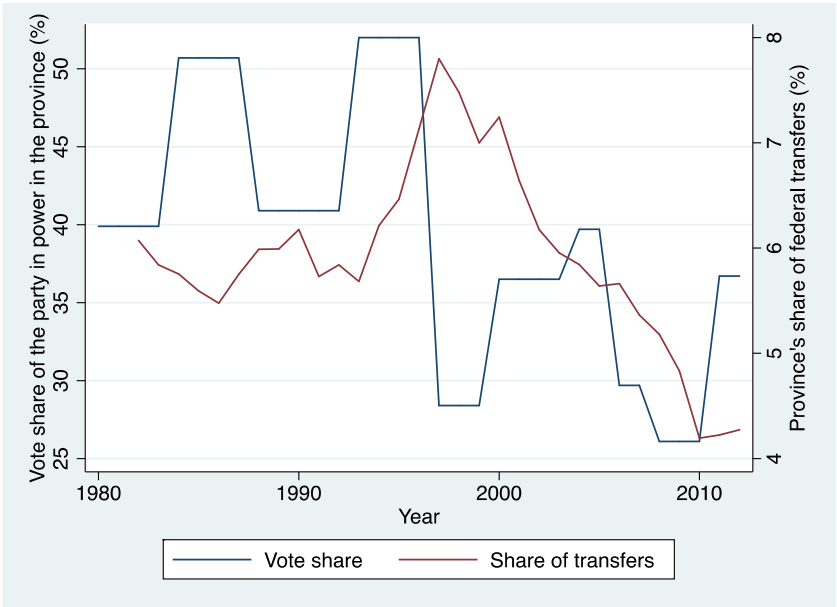

Figure 5. New Brunswick

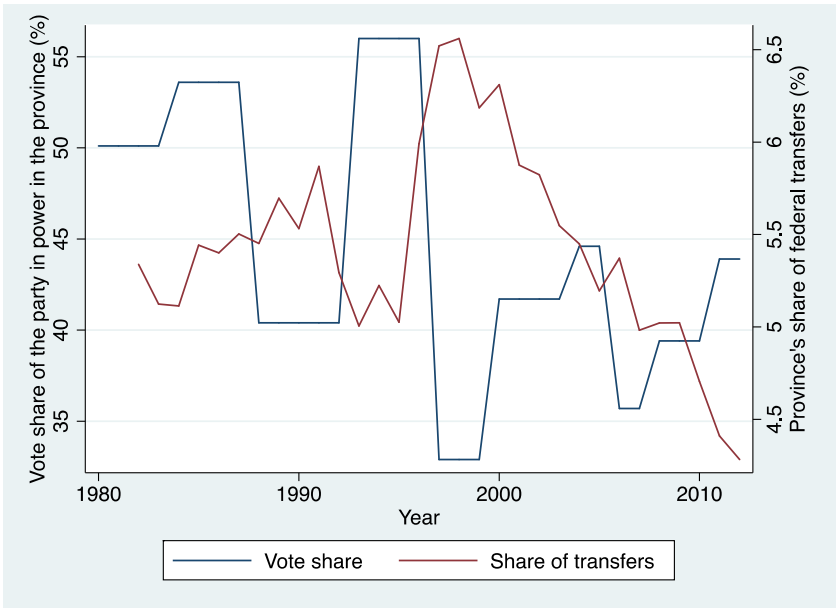

**Figure 6. Quebec**

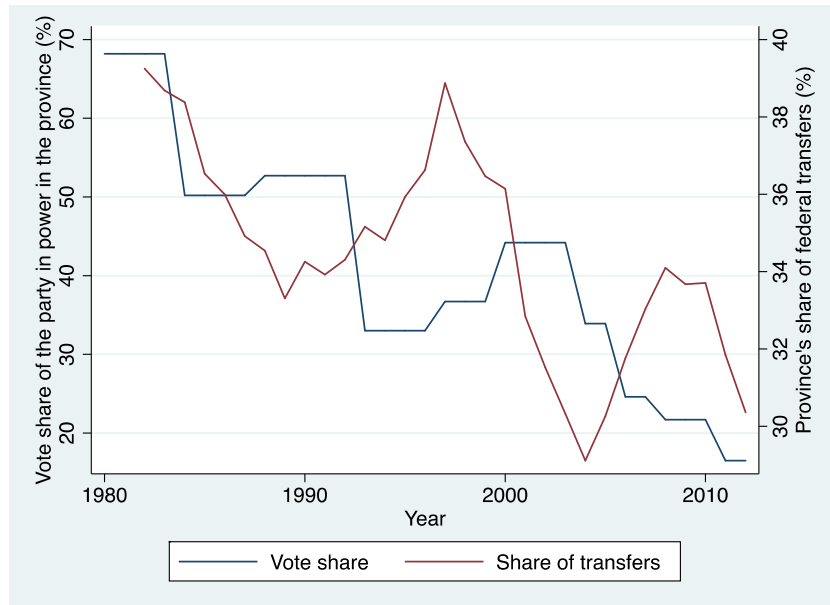

**Figure 7. Ontario**

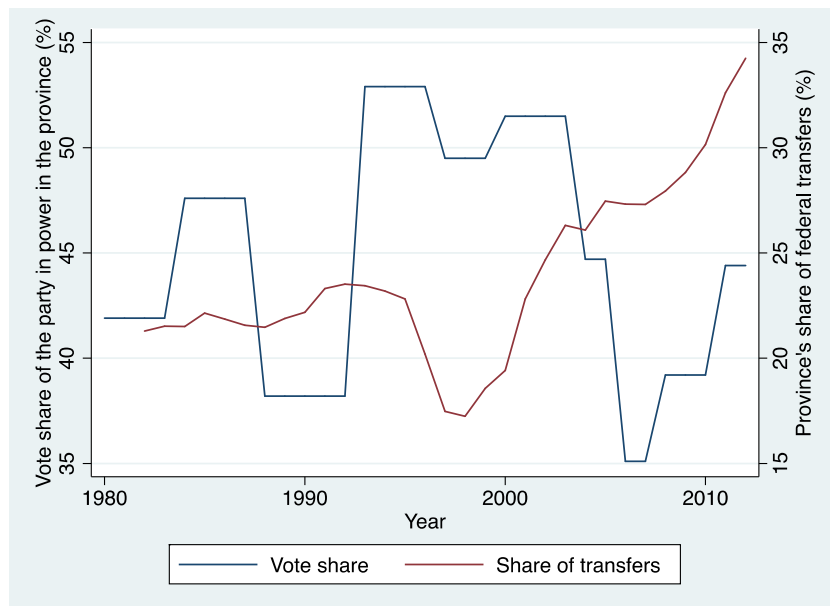

Figure 8. Manitoba

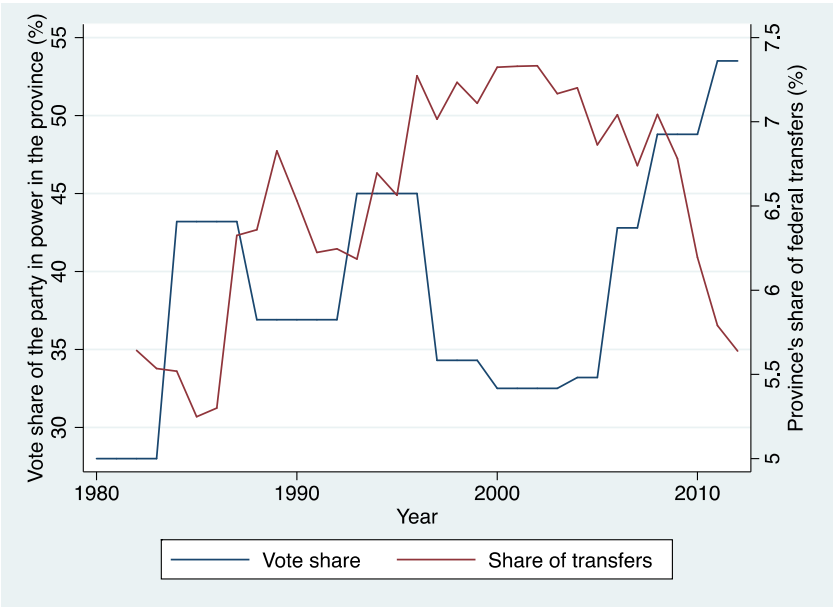

Figure 9. Saskatchewan

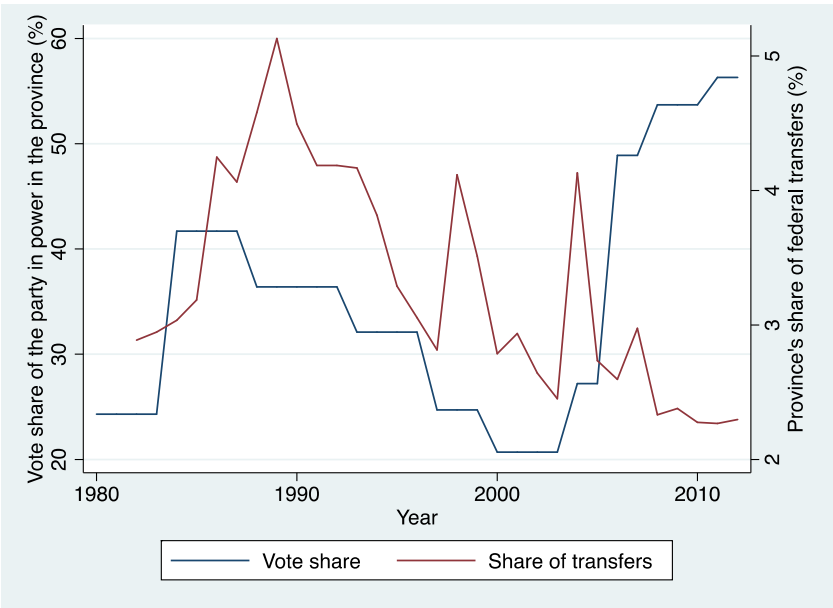



**Figure 10. Alberta**

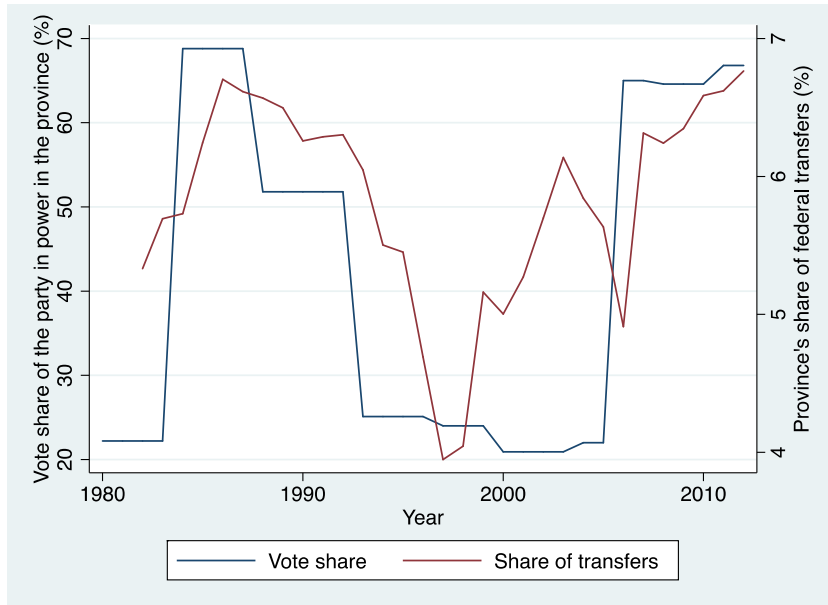

**Figure 11. British Columbia**

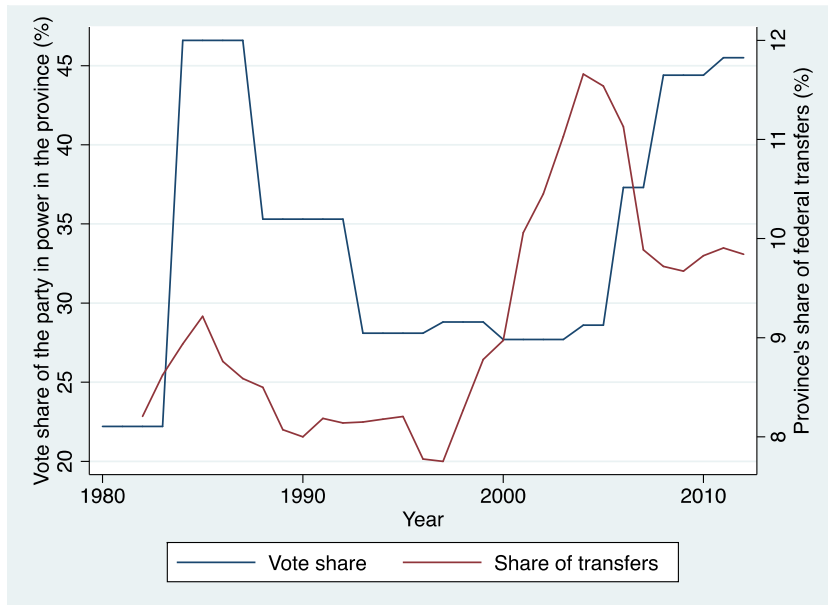

Supplement: Supplementary file 1 [file 12388541]
